# Supplementary material for: Cereal cystatins delay sprouting and nutrient loss in tubers of potato, Solanum tuberosum
Source: PubMed Central journal article supplement (PMC4687224; doi:10.1186/s12870-015-0683-2), 2015-12-21
Supplement: 12870_2015_683_MOESM1_ESM.pdf [file 12870_2015_683_MOESM1_ESM.pdf]

**Additional file 1 : Mean length of buds and sprouts on stored tubers of transgenic potato lines expressing OCI at different levels <sup>1</sup>**

| <b>OCI line</b> | <b>OCI content (% TSP) <sup>2</sup></b> | <b>Bud/sprout length (mm) <sup>3</sup></b> |
|-----------------|-----------------------------------------|--------------------------------------------|
| K2              | 0.023 ± 0.007                           | 3.6 ± 1.0                                  |
| K3              | 0.033 ± 0.007                           | 3.9 ± 0.7                                  |
| K4              | 0.008 ± 0.004                           | 4.5 ± 0.4                                  |
| K5              | 0.146 ± 0.010                           | 2.4 ± 0.4                                  |
| K7              | 0.046 ± 0.012                           | 2.8 ± 0.3                                  |
| K21             | 0.072 ± 0.012                           | 5.1 ± 1.1                                  |
| K24             | 0.018 ± 0.009                           | 4.5 ± 1.2                                  |

<sup>1</sup> These lines were produced as reported earlier [23], OCI content determined as described for lines K52 and K53 (see Methods), and stored tuber buds/sprouts examined after storage in the dark for 48 weeks at 4°C.

<sup>2</sup> OCI content is expressed relative to total soluble proteins (TSP) in flesh tissue (%). Each value is the mean of three biological replicates from tubers of different plants ± SD.

<sup>3</sup> Data are mean length of buds and sprouts at the skin surface of stored tubers. Each value is the mean of six biological (tuber) replicate values ± SD.
